# Supplementary material
Source: PubMed Central journal article supplement (PMC10158583)
Supplement: BLOOD_BLD-2022-019017-mmc1.pdf [file BLOOD_BLD-2022-019017-mmc1.pdf]

### Figure S1: Covid-19 Variants in Analyzed Sequences in Israel

Obtained by GISAID via CoVariants.org – at 1<sup>st</sup> of October, 2022

During the study period, more than 99% of the sequenced cases are Omicron sublineages (21K till end of February, then 21L till early June and then 22B till the end of the study).

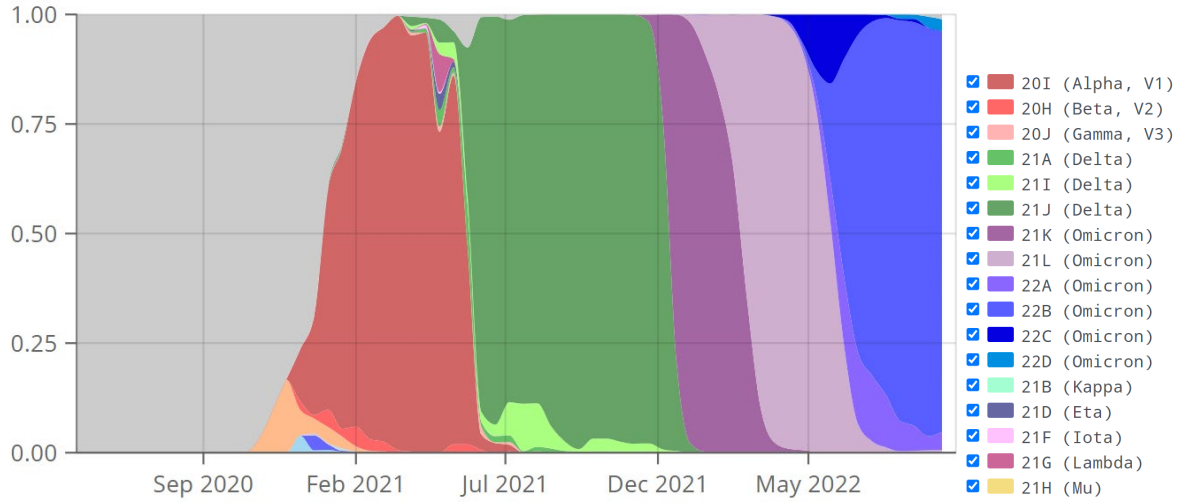

**Figure S2: The cumulative percentage of patients with Covid-19–related hospitalization (Panel A) and death of any cause (Panel B) estimated using of the Kaplan–Meier model. Treatment with Nirmatrelvir is associated with a lower hospitalization rate (p-value=0.0088) and mortality rate (p-value<0.001). To improve clarity, the Y-axis has been zoomed in to the range of 0 to 15%**

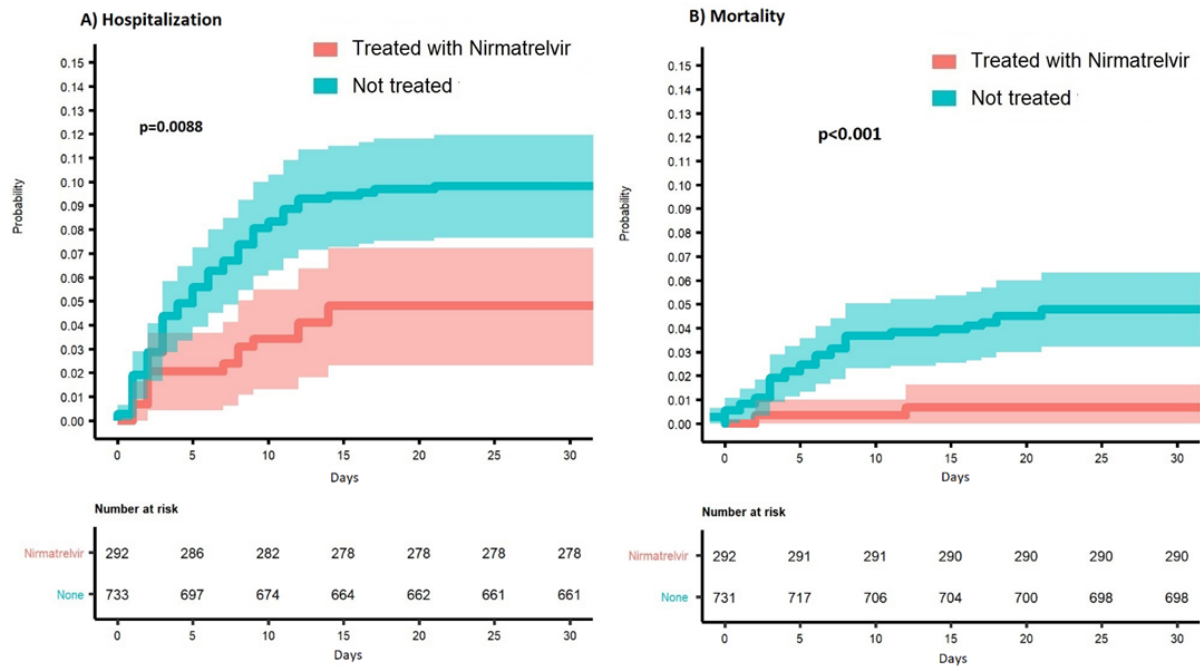

**Figure S3: Repeating the cumulative Hazard Ratio analysis presented in Figure 1B, when time zero is set to the time at which each patient had received a positive Covid-19 PCR for both treated and untreated patients. To improve clarity, the Y-axis has been zoomed in to the range of 0 to 15%**

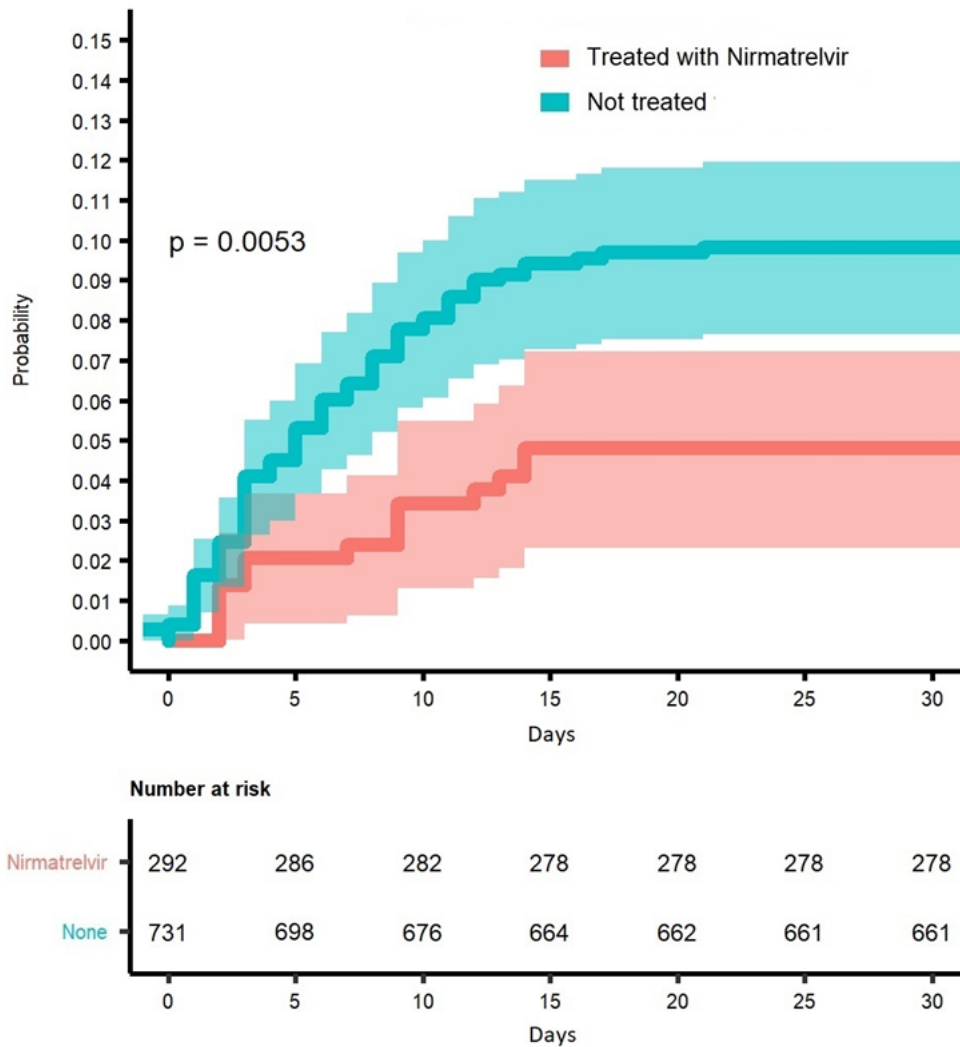

**Figure S4: Cumulative Hazard Ratio by Covid-19 anti-viral therapy, showing that the outcome of Molnupiravir group can't be distinguished from untreated group. To improve clarity, the Y-axis has been zoomed in to the range of 0 to 30%**

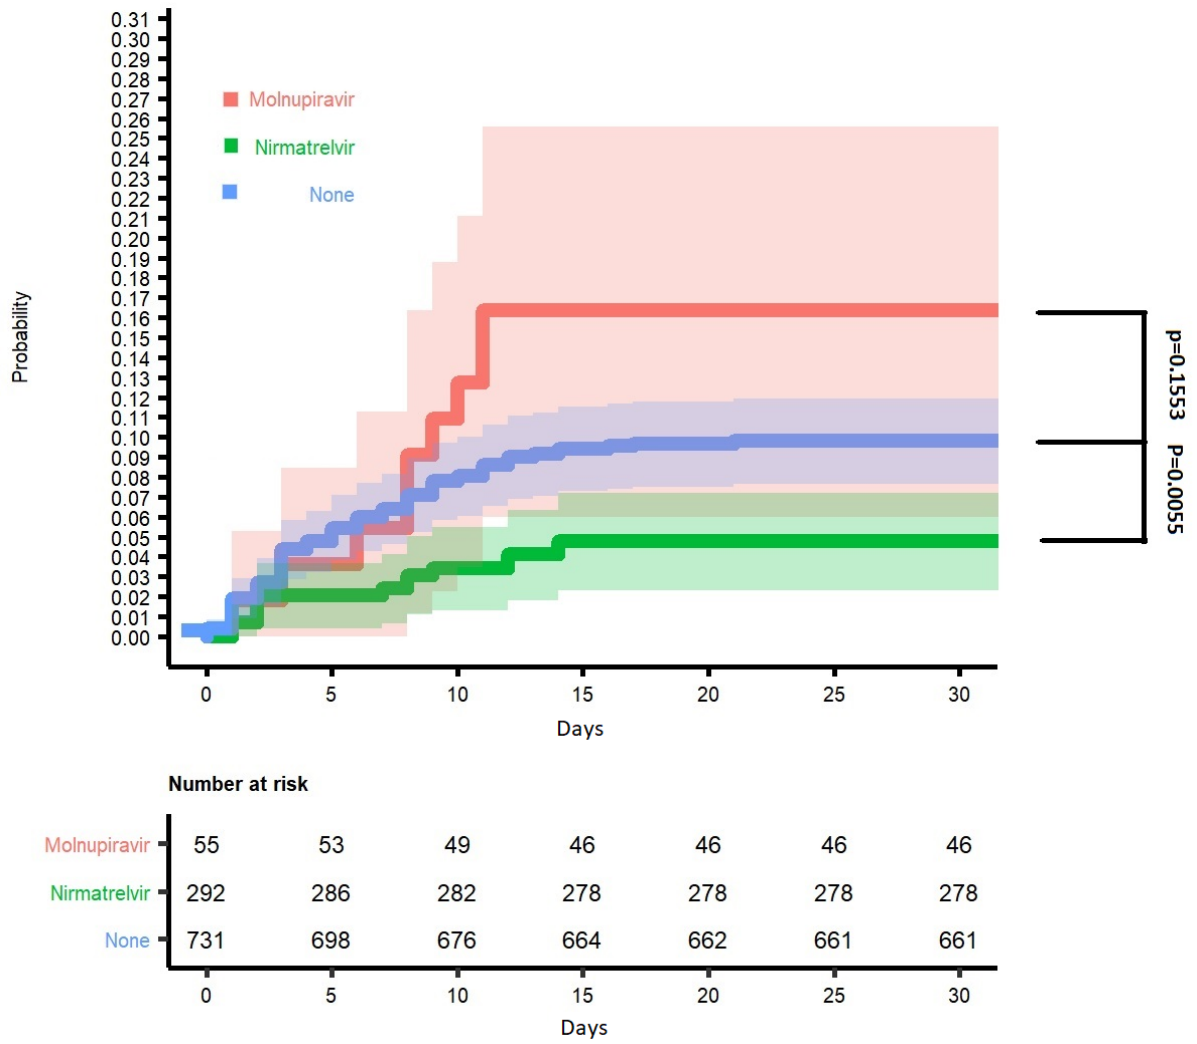

Figure S5: Cumulative Hazard Ratio by Covid-19 any anti-viral therapy, showing that the outcome of treated group can't be distinguished from untreated group. To improve clarity, the Y-axis has been zoomed in to the range of 0 to 20%

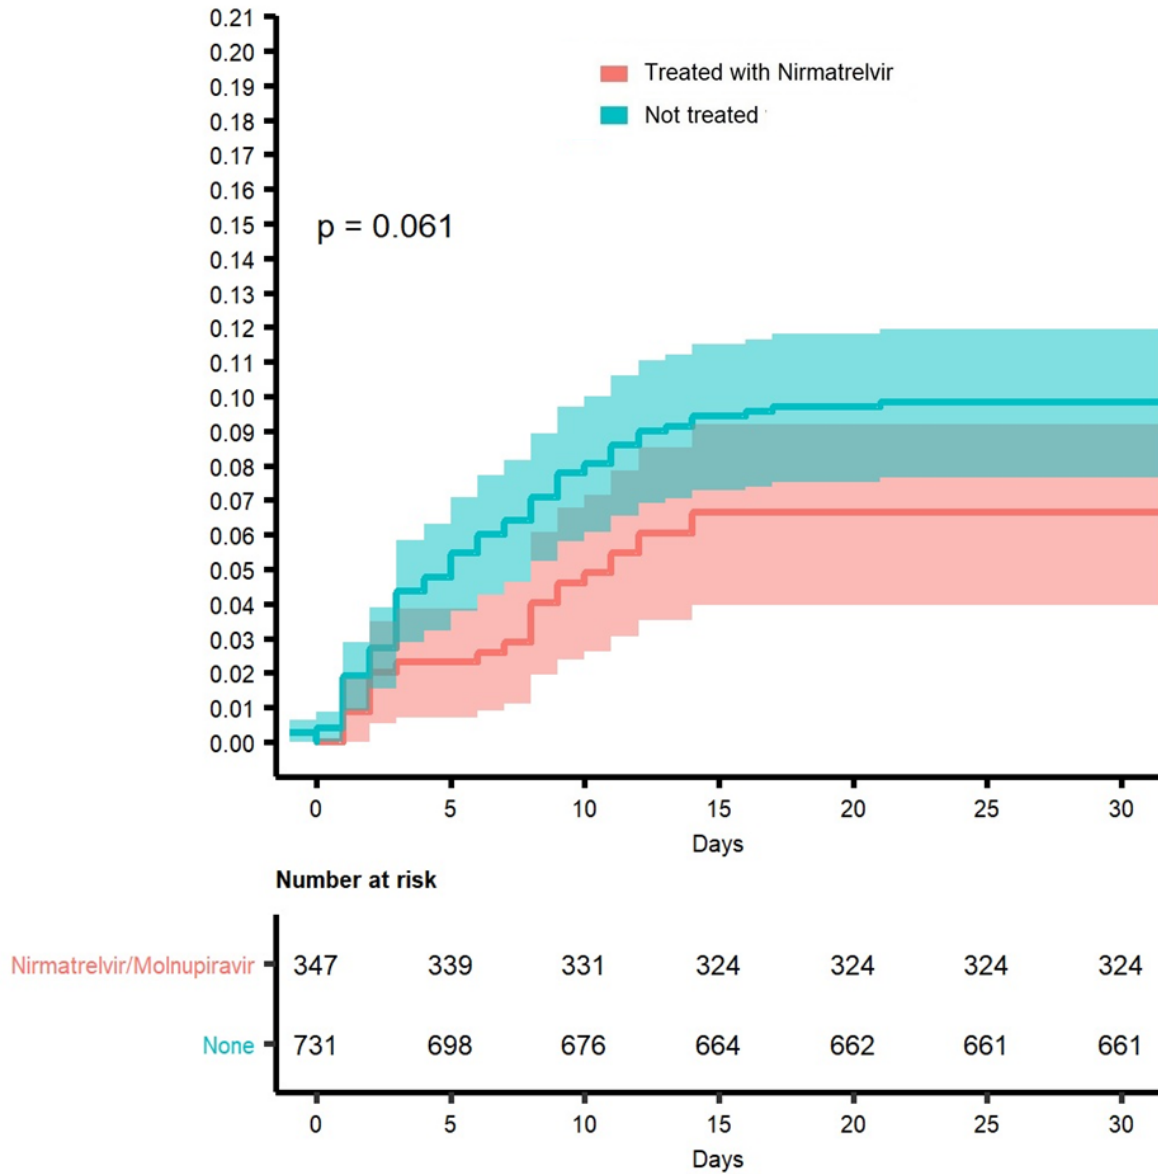

**Table S1: Demographic and Clinical Characteristics of the Patients (Full Analysis Population). P values indicate if anti-viral therapy varies considerably by factor. The first p-value refers to all three treatment options (No therapy, Molnupiravir, Nirmatrelvir) the second p-value compare only the Nirmatrelvir group to the Molnupiravir group.**

|                                                |                                                | Molnupiravir (N=55) | Nirmatrelvir (N=292) | None (N=733) | Total (N=1080) | p value | p-value Molnupiravir vs. Nirmatrelvir3 |
|------------------------------------------------|------------------------------------------------|---------------------|----------------------|--------------|----------------|---------|----------------------------------------|
| <b>Demographic</b>                             |                                                |                     |                      |              |                |         |                                        |
| <b>Age</b>                                     | Median (Q1, Q3)                                | 73 (67, 78)         | 71 (65, 77)          | 70 (61, 77)  | 71 (62, 77)    | 0.012   | 0.14                                   |
|                                                | <65                                            | 10 (18.2%)          | 81 (27.7%)           | 262 (35.7%)  | 353 (32.7%)    |         |                                        |
|                                                | ≥65                                            | 45 (81.8%)          | 211 (72.3%)          | 471 (64.3%)  | 727 (67.3%)    |         |                                        |
| <b>Gender</b>                                  | Female                                         | 19 (34.5%)          | 132 (45.2%)          | 313 (42.7%)  | 464 (43.0%)    | 0.332   | 0.144                                  |
|                                                | Male                                           | 36 (65.5%)          | 160 (54.8%)          | 420 (57.3%)  | 616 (57.0%)    |         |                                        |
| <b>Ethnic Group</b>                            | Arabic                                         | 1 (1.8%)            | 4 (1.4%)             | 21 (2.9%)    | 26 (2.4%)      | 0.259   | 0.452                                  |
|                                                | Former USSR                                    | 7 (12.7%)           | 16 (5.5%)            | 91 (12.4%)   | 114 (10.6%)    |         |                                        |
|                                                | Moderate Orthodox                              | 0 (0.0%)            | 11 (3.8%)            | 16 (2.2%)    | 27 (2.5%)      |         |                                        |
|                                                | General Jew                                    | 46 (83.6%)          | 258 (88.4%)          | 575 (78.4%)  | 879 (81.4%)    |         |                                        |
|                                                | Orthodox Jew                                   | 1 (1.8%)            | 3 (1.0%)             | 30 (4.1%)    | 34 (3.1%)      |         |                                        |
| <b>Socioeconomic Score</b>                     | Median (Q1, Q3)                                | 8 (5, 9)            | 8 (7, 9)             | 7 (5, 9)     | 7 (5, 9)       | < 0.001 | 0.121                                  |
| <b>CLL Status and Therapy</b>                  |                                                |                     |                      |              |                |         |                                        |
| <b>Treatment Status</b>                        | Treatment Naïve                                | 26 (47.3%)          | 171 (58.6%)          | 548 (74.8%)  | 745 (69.0%)    | < 0.001 | 0.062                                  |
|                                                | Off Therapy                                    | 12 (21.8%)          | 66 (22.6%)           | 118 (16.1%)  | 196 (18.1%)    |         |                                        |
|                                                | On Therapy                                     | 17 (30.9%)          | 55 (18.8%)           | 67 (9.1%)    | 139 (12.9%)    |         |                                        |
| <b>Number of CLL Treatments</b>                | Median (Q1, Q3)                                | 1 (0, 2)            | 0 (0, 1)             | 0 (0, 1)     | 0 (0, 1)       | < 0.001 | 0.019                                  |
| <b>Current Treatment</b>                       | BTki                                           | 14 (25.5%)          | 41 (13.9%)           | 48 (6.5%)    | 103 (9.5%)     | 0.865   | 0.665                                  |
|                                                | Ven                                            | 3 (5.5%)            | 12 (4.1%)            | 15 (2.0%)    | 30 (2.8%)      |         |                                        |
| <b>Time since last Anti-CD20 therapy</b>       | <12 mo                                         | 6 (10.9%)           | 18 (6.2%)            | 34 (4.6%)    | 58 (5.4%)      | 0.565   | 0.295                                  |
|                                                | ≥12 mo                                         | 12 (21.8%)          | 65 (22.3%)           | 101 (13.7%)  | 178 (16.4%)    |         |                                        |
| <b>IVIg Treatment</b>                          |                                                | 6 (10.9%)           | 35 (12.0%)           | 48 (6.5%)    | 89 (8.2%)      | 0.013   | 0.821                                  |
| <b>Frequent Comorbidities and Risk Factors</b> |                                                |                     |                      |              |                |         |                                        |
| <b>Diseases of the Circulatory System</b>      |                                                |                     |                      |              |                |         |                                        |
|                                                | Cardiac arrhythmia                             | 18 (32.7%)          | 98 (33.6%)           | 212 (28.9%)  | 328 (30.4%)    | 0.321   | 0.904                                  |
|                                                | Heart Failure                                  | 2 (3.6%)            | 18 (6.2%)            | 57 (7.8%)    | 77 (7.1%)      | 0.39    | 0.461                                  |
|                                                | Hypertension                                   | 33 (60.0%)          | 189 (64.7%)          | 450 (61.4%)  | 672 (62.2%)    | 0.575   | 0.504                                  |
|                                                | Other Cerebrovascular Disease                  | 1 (1.8%)            | 23 (7.9%)            | 46 (6.3%)    | 70 (6.5%)      | 0.228   | 0.105                                  |
|                                                | Other Heart Disease                            | 6 (10.9%)           | 54 (18.5%)           | 148 (20.2%)  | 208 (19.3%)    | 0.225   | 0.173                                  |
|                                                | Stroke                                         | 1 (1.8%)            | 21 (7.2%)            | 54 (7.4%)    | 76 (7.0%)      | 0.298   | 0.134                                  |
| <b>Endocrine And Metabolic Diseases</b>        |                                                |                     |                      |              |                |         |                                        |
|                                                | Diabetes Mellitus                              | 16 (29.1%)          | 87 (29.8%)           | 237 (32.3%)  | 340 (31.5%)    | 0.678   | 0.917                                  |
|                                                | Disorder Of Thyroid                            | 13 (23.6%)          | 65 (22.3%)           | 187 (25.5%)  | 265 (24.5%)    | 0.544   | 0.823                                  |
|                                                | Disorders of lipid metabolism                  | 39 (70.9%)          | 192 (65.8%)          | 517 (70.5%)  | 748 (69.3%)    | 0.315   | 0.458                                  |
|                                                | Obesity                                        | 17 (30.9%)          | 123 (42.1%)          | 295 (40.2%)  | 435 (40.3%)    | 0.298   | 0.12                                   |
|                                                | Other Metabolic Disorders                      | 4 (7.3%)            | 36 (12.3%)           | 79 (10.8%)   | 119 (11.0%)    | 0.512   | 0.282                                  |
| <b>Hematological diseases</b>                  |                                                |                     |                      |              |                |         |                                        |
|                                                | ALL                                            | 1 (1.8%)            | 16 (5.5%)            | 39 (5.3%)    | 56 (5.2%)      | 0.51    | 0.249                                  |
|                                                | AML                                            | 2 (3.6%)            | 0 (0.0%)             | 13 (1.8%)    | 15 (1.4%)      | 0.031   | 0.001                                  |
|                                                | CML                                            | 7 (12.7%)           | 46 (15.8%)           | 111 (15.1%)  | 164 (15.2%)    | 0.847   | 0.568                                  |
|                                                | Diseases Of the Blood and Blood Forming Organs | 30 (54.5%)          | 142 (48.6%)          | 375 (51.2%)  | 547 (50.6%)    | 0.642   | 0.422                                  |
|                                                | Hodgkin                                        | 2 (3.6%)            | 2 (0.7%)             | 14 (1.9%)    | 18 (1.7%)      | 0.194   | 0.06                                   |
|                                                | Lymphadenopathy                                | 27 (49.1%)          | 98 (33.6%)           | 281 (38.3%)  | 406 (37.6%)    | 0.071   | 0.028                                  |
|                                                | Myeloproliferative diseases                    | 1 (1.8%)            | 13 (4.5%)            | 33 (4.5%)    | 47 (4.4%)      | 0.639   | 0.363                                  |
|                                                | NHL                                            | 18 (32.7%)          | 69 (23.6%)           | 204 (27.8%)  | 291 (26.9%)    | 0.24    | 0.154                                  |
|                                                | Other Haematological Malignancies              | 20 (36.4%)          | 81 (27.7%)           | 230 (31.4%)  | 331 (30.6%)    | 0.335   | 0.197                                  |
|                                                | Splenomegaly                                   | 4 (7.3%)            | 20 (6.8%)            | 64 (8.7%)    | 88 (8.1%)      | 0.593   | 0.91                                   |
| <b>Kidney diseases</b>                         |                                                |                     |                      |              |                |         |                                        |
| <b>Chronic Kidney Disease</b>                  | -A (GFR above 90 and proteinuria)              | 1 (1.8%)            | 4 (1.4%)             | 19 (2.6%)    | 24 (2.2%)      | 0.028   | 0.008                                  |
|                                                | -A1 (GFR 60 to 89 and proteinuria)             | 2 (3.6%)            | 14 (4.8%)            | 40 (5.5%)    | 56 (5.2%)      |         |                                        |
|                                                | -B (GFR 30 to 59)                              | 31 (56.4%)          | 110 (37.7%)          | 266 (36.3%)  | 407 (37.7%)    |         |                                        |
|                                                | -C (GFR 15 to 29)                              | 3 (5.5%)            | 3 (1.0%)             | 14 (1.9%)    | 20 (1.9%)      |         |                                        |
|                                                | -D (GFR below 15 or dialysis)                  | 1 (1.8%)            | 0 (0.0%)             | 2 (0.3%)     | 5 (0.3%)       |         |                                        |
|                                                | Other Renal Failure                            | 5 (9.1%)            | 43 (14.7%)           | 97 (13.2%)   | 145 (13.4%)    | 0.513   | 0.268                                  |
| <b>Liver diseases</b>                          |                                                |                     |                      |              |                |         |                                        |
|                                                | Hepatic disease                                | 15 (27.3%)          | 74 (25.3%)           | 181 (24.7%)  | 270 (25.0%)    | 0.902   | 0.764                                  |
|                                                | Hepatomegaly                                   | 1 (1.8%)            | 4 (1.4%)             | 18 (2.5%)    | 23 (2.1%)      | 0.547   | 0.798                                  |
| <b>Mental Disorders</b>                        |                                                |                     |                      |              |                |         |                                        |
|                                                | Nonpsychotic Mental Disorders                  | 24 (43.6%)          | 111 (38.0%)          | 292 (39.8%)  | 427 (39.5%)    | 0.706   | 0.433                                  |
| <b>Neurologic diseases</b>                     |                                                |                     |                      |              |                |         |                                        |
|                                                | Neurologic disease                             | 3 (5.5%)            | 21 (7.2%)            | 63 (8.6%)    | 87 (8.1%)      | 0.582   | 0.642                                  |
| <b>Other Malignancy</b>                        |                                                |                     |                      |              |                |         |                                        |
|                                                | Calculus Of Kidney And Ureter                  | 9 (16.4%)           | 62 (21.2%)           | 176 (24.0%)  | 247 (22.9%)    | 0.316   | 0.412                                  |
|                                                | Melanoma                                       | 4 (7.3%)            | 16 (5.5%)            | 32 (4.4%)    | 52 (4.8%)      | 0.515   | 0.601                                  |
|                                                | Non-Melanoma Skin Malignancy                   | 20 (36.4%)          | 115 (39.4%)          | 240 (32.7%)  | 375 (34.7%)    | 0.127   | 0.674                                  |
|                                                | Other Malignancy                               | 19 (34.5%)          | 72 (24.7%)           | 184 (25.1%)  | 275 (25.5%)    | 0.281   | 0.127                                  |
|                                                | Other Malignancy In Situ or Pre Cancer         | 12 (21.8%)          | 60 (20.5%)           | 159 (21.7%)  | 231 (21.4%)    | 0.919   | 0.831                                  |
| <b>Respiratory System</b>                      |                                                |                     |                      |              |                |         |                                        |
|                                                | Asthma                                         | 1 (1.8%)            | 12 (4.1%)            | 29 (4.0%)    | 42 (3.9%)      | 0.713   | 0.412                                  |
|                                                | COPD                                           | 4 (7.3%)            | 32 (11.0%)           | 59 (8.0%)    | 95 (8.8%)      | 0.306   | 0.412                                  |
| <b>Recent Infection Events</b>                 | Median (Q1, Q3)                                | 2 (1, 4)            | 1 (0, 3)             | 1 (0, 3)     | 1 (0, 3)       | 0.203   | 0.07                                   |
| <b>Recent hospitalizations</b>                 |                                                | 31 (56.4%)          | 102 (34.9%)          | 304 (41.5%)  | 437 (40.5%)    | 0.008   | 0.003                                  |
| <b>Previous Covid Infection</b>                | Yes                                            | 5 (9.1%)            | 44 (15.1%)           | 83 (11.3%)   | 132 (12.2%)    | 0.196   | 0.244                                  |

Table S2: The association between Nirmatrelvir or Molnupiravir therapy and Covid-19–related hospitalization or death was estimated with the use of a multivariate Cox proportional-hazards regression model after adjustment for confounding factors. Variables that met the testing criteria and were significantly associated with the outcome served as the inputs for the multivariate regression analysis. <sup>1</sup> recent refers last three years. <sup>2</sup> Number of doses counts both mRNA-based vaccines (mainly Pfizer) and passive vaccines (75 patients received Tixagevimab and Cilgavimab )

| Variable                                             | Hazard Ratio for Covid-19 related Hospitalization or Death | p value   |
|------------------------------------------------------|------------------------------------------------------------|-----------|
| Age                                                  | 1.05 [1.03-1.07]                                           | < .001*** |
| Number of Prior CLL Treatments                       | 1.33 [1.12-1.59]                                           | 0.0015 ** |
| Recent Hospitalizations <sup>1</sup>                 | 1.84 [1.2-2.83]                                            | 0.0052 ** |
| IVIG Treatment                                       | 1.77 [1.09-3.16]                                           | 0.041 *   |
| Nirmatrelvir                                         | 0.48 [0.26-0.86]                                           | 0.0144 *  |
| Molnupiravir                                         | 1.58 [0.83-3.02]                                           | 0.1655    |
| Previous Covid-19 Infection                          | 0.25 [0.09-0.68]                                           | 0.0072 ** |
| Doses of Covid-19 Vaccine <sup>2</sup> pre infection | 0.75 [0.65-0.87]                                           | < .001*** |
| Recent Melanoma <sup>1</sup>                         | 1.73 [1.09-2.78]                                           | 0.0213 *  |
| Recent Other Malignancy <sup>1</sup>                 | 0.41 [0.2-0.85]                                            | 0.0167 *  |
| Asthma                                               | 2.48 [1.14-5.41]                                           | 0.0219 *  |
| Myeloproliferative diseases                          | 3.01 [1.51-6.06]                                           | 0.0019 ** |
| Chronic kidney disease status                        | 1.02 [0.57-1.78]                                           | 0.82      |
